# Supplementary material
Source: PubMed Central journal article supplement (PMC2200847)

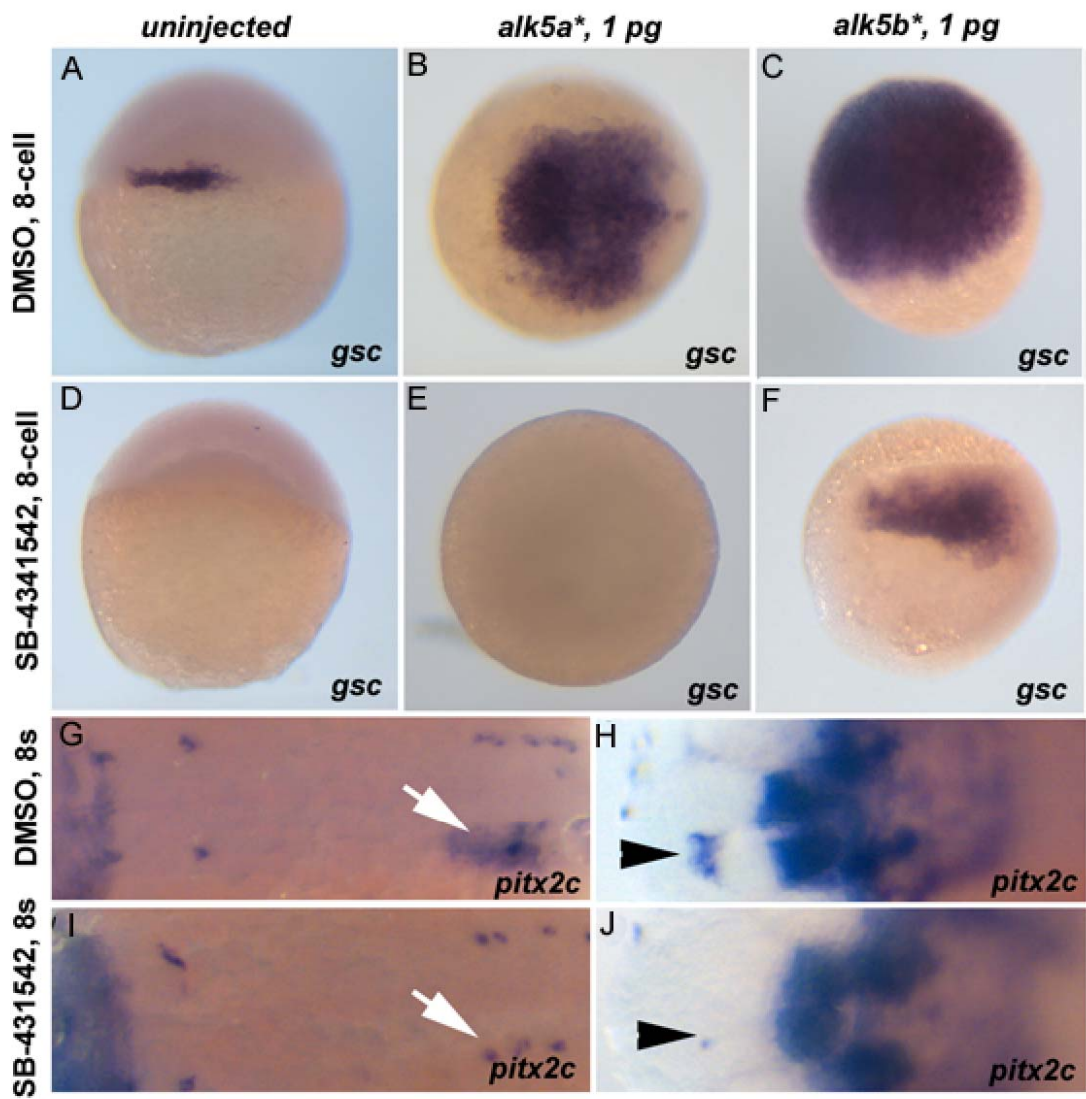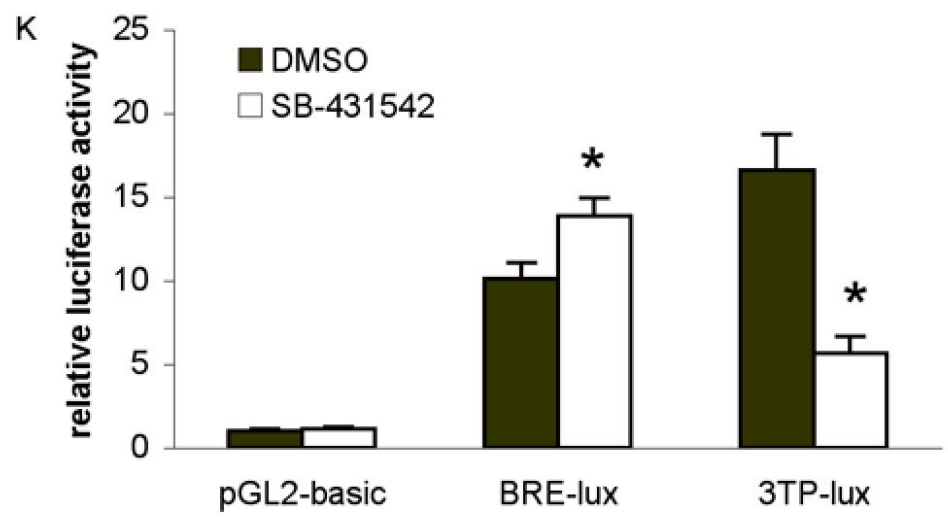

Supplement: blood_blood-2007-08-107359_5.pdf [file blood_blood-2007-08-107359_5.pdf]
